# Supplementary material
Source: publisher figshare collection journal article supplement (https://asha.figshare.com/articles/dataset/_/27885447)
Supplement: Supplementary file 2 [file 2]

## **Supplemental Material S1. SLP AAC-Telehealth Survey.**

### Telehealth Survey

Medicare will be ending reimbursement for telehealth speech therapy services, including AAC services, at the end of 2024.

This survey is being conducted to gather data to inform policy makers with regard to barriers to receiving in-person services and the utilization of telehealth in the provision of AAC services.

This is an anonymous survey. The results will be made available by USSAAC.

Only one SLP should complete this survey and provide responses for the clinic or private practice.

Indicate the state in which you provide services.

- ☐ Alabama (1)
- ☐ Alaska (2)
- ☐ Arizona (3)
- ☐ Arkansas (4)
- ☐ California (5)
- ☐ Colorado (6)
- ☐ Connecticut (7)
- ☐ Delaware (8)
- ☐ District of Columbia (9)
- ☐ Florida (10)
- ☐ Georgia (11)
- ☐ Hawaii (12)
- ☐ Idaho (13)
- ☐ Illinois (14)
- ☐ Indiana (15)
- ☐ Iowa (16)
- ☐ Kansas (17)
- ☐ Kentucky (18)
- ☐ Louisiana (19)
- ☐ Maine (20)
- ☐ Maryland (21)

- ☐ Massachusetts (22)
- ☐ Michigan (23)
- ☐ Minnesota (24)
- ☐ Mississippi (25)
- ☐ Missouri (26)
- ☐ Montana (27)
- ☐ Nebraska (28)
- ☐ Nevada (29)
- ☐ New Hampshire (30)
- ☐ New Jersey (31)
- ☐ New Mexico (32)
- ☐ New York (33)
- ☐ North Carolina (34)
- ☐ North Dakota (35)
- ☐ Ohio (36)
- ☐ Oklahoma (37)
- ☐ Oregon (38)
- ☐ Pennsylvania (39)
- ☐ Puerto Rico (40)
- ☐ Rhode Island (41)
- ☐ South Carolina (42)

- ☐ South Dakota (43)
- ☐ Tennessee (44)
- ☐ Texas (45)
- ☐ Utah (46)
- ☐ Vermont (47)
- ☐ Virginia (48)
- ☐ Washington (49)
- ☐ West Virginia (50)
- ☐ Wisconsin (51)
- ☐ Wyoming (52)
- ☐ Clinic not in the U.S> (53)

#### Type of Clinic

- ☐ University Clinic (1)
- ☐ Hospital Clinic (2)
- ☐ School System (3)
- ☐ Non-Profit Clinic (4)
- ☐ Private Practice (5)

## Number of SLPs at Clinic or Practice

---

Number of clients receiving telehealth AAC services per year.

- ☐ <25 (1)
- ☐ 26-50 (2)
- ☐ 51-75 (3)
- ☐ 76-100 (4)
- ☐ 101-150 (5)
- ☐ 151-200 (6)
- ☐ >200 (7)

Number of clients who received AAC services at home or in the clinic per year.

- ☐ <25 (1)
- ☐ 26-50 (2)
- ☐ 51-75 (3)
- ☐ 76-100 (4)
- ☐ 101-150 (5)
- ☐ 151-200 (6)
- ☐ >200 (7)

Number of AAC telehealth evaluations per year.

- ☐ <25 (1)
- ☐ 26-50 (2)
- ☐ 51-75 (7)
- ☐ 76-100 (3)
- ☐ 101-150 (4)
- ☐ 151-200 (5)
- ☐ >200 (6)

Number of AAC telehealth therapy sessions per year.

- ☐ <25 (1)
- ☐ 26-50 (2)
- ☐ 51-75 (3)
- ☐ 76-100 (4)
- ☐ 101-150 (5)
- ☐ 151-200 (6)
- ☐ >200 (7)

Number of AAC telehealth device programming sessions per year.

- ☐ <25 (1)
- ☐ 26-50 (2)
- ☐ 51-75 (3)
- ☐ 76-100 (4)
- ☐ 101-150 (5)
- ☐ 151-200 (6)
- ☐ >200 (7)

Number of telehealth sessions for family member or caregiver/support person training and/or counseling per year.

- ☐ <25 (1)
- ☐ 26-50 (2)
- ☐ 51-75 (3)
- ☐ 75-100 (4)
- ☐ 101-150 (5)
- ☐ 151-200 (6)
- ☐ >200 (7)

What are the reasons clients, family members or their caregivers/support persons have given for choosing to receive AAC services via telehealth. (check all that apply)

- ☐ Lack of locally available qualified provider (1)
- ☐ Lack of access to someone to accompanying them to the clinic/office (2)
- ☐ Lack of adequate transportation to accommodate a wheelchair. (3)
- ☐ Lack of transportation in general. (4)
- ☐ Concerns about the AAC client's fatigue level resulting from transportation. (5)
- ☐ Concerns that the visits would be too long and require multiple trips rather than be broken into multiple, less fatiguing, shorter telehealth visits. (6)
- ☐ Availability of more caregivers/support persons who can contribute and be trained at each AAC session in the home. (7)
- ☐ Ability to be evaluated or trained in the environment in which the AAC systems will be utilized. (8)
- ☐ Availability of equipment to support, breathing, positioning, toileting, feeding and administration of medications. (9)
- ☐ Other (10)

*Display This Question:*

*If What are the reasons clients, family members or their caregivers/support persons have given for c... = Other*

If you selected "other" indicate the types of reasons given.

---



If you provide both telehealth and outpatient AAC services, what is the percentage of patients who request telehealth over coming to your clinic/office?

---

Indicate the types of transportation issues your clients face. (check all that apply).

- ☐ Lack of accessible public transportation (1)
- ☐ Lack of accessible personal transportation (2)
- ☐ Lack of accompanying person for travel (3)
- ☐ Medical condition prohibits travel (4)
- ☐ Cost of transportation (5)
- ☐ Cost of overnight stay (6)
- ☐ Other (7)

*Display This Question:*

*If Indicate the types of transportation issues your clients face. (check all that apply). = Other*

If you selected "other" indicate the types of transportation issues.

---

Number of pediatric AAC clients seen by your practice (under 22)

- ☐ <25 (1)
- ☐ 26-50 (2)
- ☐ 51-75 (3)
- ☐ 76-100 (4)
- ☐ 101-150 (5)
- ☐ 151-200 (6)
- ☐ >200 (7)

Number of adult AAC clients seen by your practice

- ☐ <25 (1)
- ☐ 26-50 (2)
- ☐ 51-75 (3)
- ☐ 76-100 (4)
- ☐ 101-150 (5)
- ☐ 151-200 (6)
- ☐ >200 (7)

Pediatric clients funding sources (check all that apply)

- ☐ School (1)
- ☐ Medicaid (2)
- ☐ Third Party Insurance (3)
- ☐ Private Pay (4)

Adult clients funding sources (check all that apply)

- ☐ Medicare (1)
- ☐ Medicaid (2)
- ☐ Third Party Insurance (3)
- ☐ Workman's Compensation (4)
- ☐ Veteran's Administration (5)
- ☐ Tricare (6)
- ☐ Vocational Rehabilitation (7)
- ☐ Private Pay (8)

Number of your AAC clients for whom transportation to receive services is an issue.

- ☐ <25 (1)
- ☐ 26-50 (2)
- ☐ 51-75 (3)
- ☐ 76-100 (4)
- ☐ 101-150 (5)
- ☐ 151-200 (6)
- ☐ >200 (7)

Distance AAC clients must travel to receive AAC services (check all that apply)

- ☐ 1-2 Miles (1)
- ☐ 3-5 Miles (2)
- ☐ 6-10 Miles (3)
- ☐ 11-20 Miles (4)
- ☐ 21-30 Miles (5)
- ☐ 31-40 Miles (6)
- ☐ 41-50 Miles (7)
- ☐ 51-100 Miles (8)
- ☐ >100 Miles (9)

Time it takes for AAC clients to travel to receive AAC services (check all that apply)

- ☐ Under an hour (1)
- ☐ 1-2 hours (2)
- ☐ 3-4 hours (3)
- ☐ 5-6 hours (4)
- ☐ More than 6 hours (5)

Enter comments about how the ability to provide AAC services via telehealth has impacted the clients your serve.

---

Enter comments about how being able to provide AAC via telehealth has impacted your clinic/practice.

---
